# Supplementary material for: Polychromatic fluorescent MoS2 quantum dots: fabrication and off–on sensing for fluorine ions in water
Source: Royal Society of Chemistry journal article supplement (doi:10.1039/d3ay00346a), 2023-01-01
Supplement: d3ay00346a1.pdf [file d3ay00346a1.pdf]

## Supplementary material

### **Polychromatic fluorescent MoS<sub>2</sub> quantum dots: fabrication and off-on sensing for fluorine ion in water**

Feng-Yi Wu, Ji-Liang Yang, You-Sheng Ye, Ya-Qiong Kong, Rong Wu,

Hai-Yan Wang, Xin Wang

*Water environment research center, College of Chemistry and Material  
Engineering, Chaohu University, Hefei 238000, China*

Email: [wfy@chu.edu.cn](mailto:wfy@chu.edu.cn)

## Content

|                                                 |   |
|-------------------------------------------------|---|
| 1. Figures and Tables .....                     | 1 |
| 2. Formula and calculation .....                | 5 |
| 2.1 Photoluminescence quantum yield (PLQY)..... | 5 |
| 2.2 Computational detail of DFT .....           | 6 |
| 2.3 The Stern–Volmer equation .....             | 6 |
| 3. References .....                             | 7 |

## 1. Figures and Tables

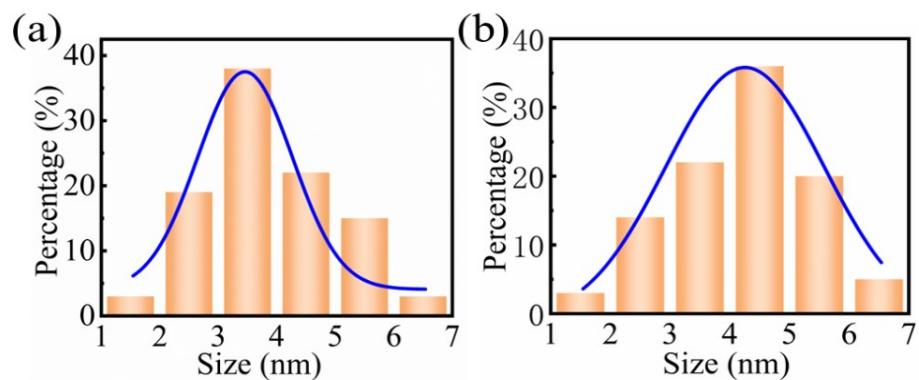

**Fig. S1** Size distributions of MoS<sub>2</sub> QDs (a) and I-MoS<sub>2</sub> QDs (b)

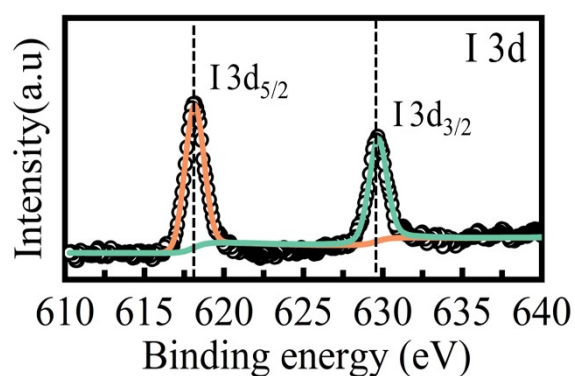

**Fig. S2** High-resolution XPS spectra of iodine (I 3d) in I-MoS<sub>2</sub> QDs Binding energies of I 3d<sub>3/2</sub> and I 3d<sub>5/2</sub> are 629.41 and 617.95 eV.

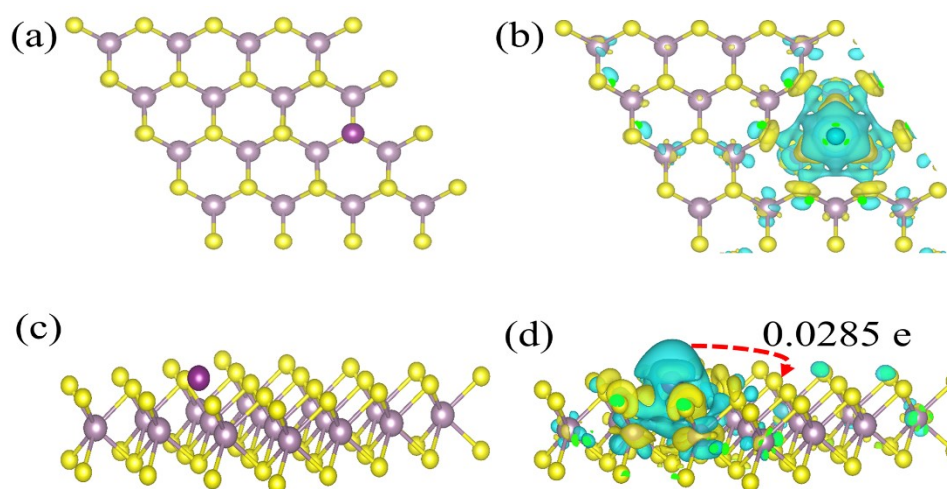

**Fig. S3** Optimized geometries for I-MoS<sub>2</sub> QDs in the top (a) and side (c) view (bright

yellow spheres denote S element, lavender spheres: Mo element, purple spheres: I element). Top (b) and side (d) view of charge density difference plots for I-MoS<sub>2</sub> QDs. The khaki and cyan distribution respectively represent electron accumulation and depletion. Isosurface was set as e<sup>-1</sup>Å<sup>3</sup>

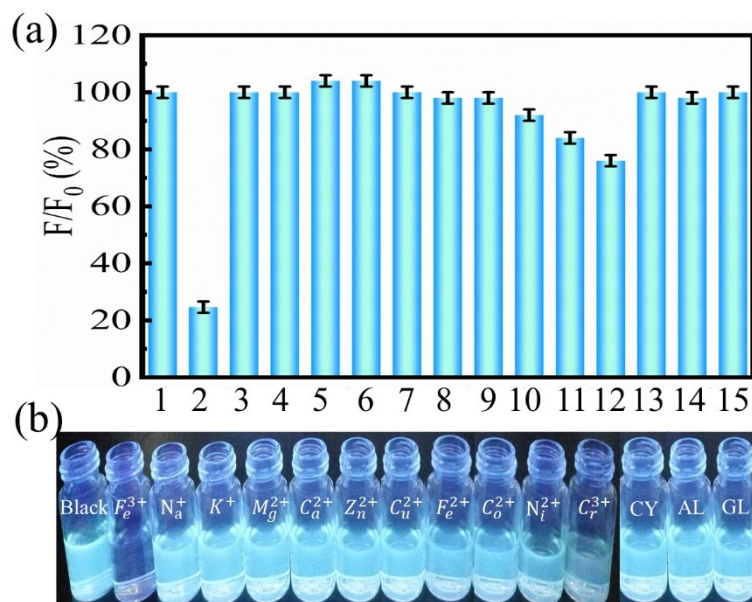

**Fig. S4** (a) Relative Fluorescence intensities of I-MoS<sub>2</sub> QDs (10  $\mu$ M) mixed with different metal ions (250  $\mu$ M) in aqueous solution. Bars donate the emission intensity ratio  $F/F_0$  ( $F_0$  and  $F$  represent the fluorescence intensities of I-MoS<sub>2</sub> QDs without and with different metal ions and the small molecules, 1=blank, 2= $Fe^{3+}$ , 3= $Na^+$ , 4= $K^+$ , 5= $Mg^{2+}$ , 6= $Ca^{2+}$ , 7= $Zn^{2+}$ , 8= $Cu^{2+}$ , 9= $Fe^{2+}$ , 10= $Co^{2+}$ , 11= $Ni^{2+}$ , 12= $Cr^{3+}$  ions, 13=L-cysteine (CY), 14=alanine(AL), and 15=glycine(GL)). (b) Under 365 nm UV light, the corresponding pictures of I-MoS<sub>2</sub> QDs without and with different metal ions and the small molecules.

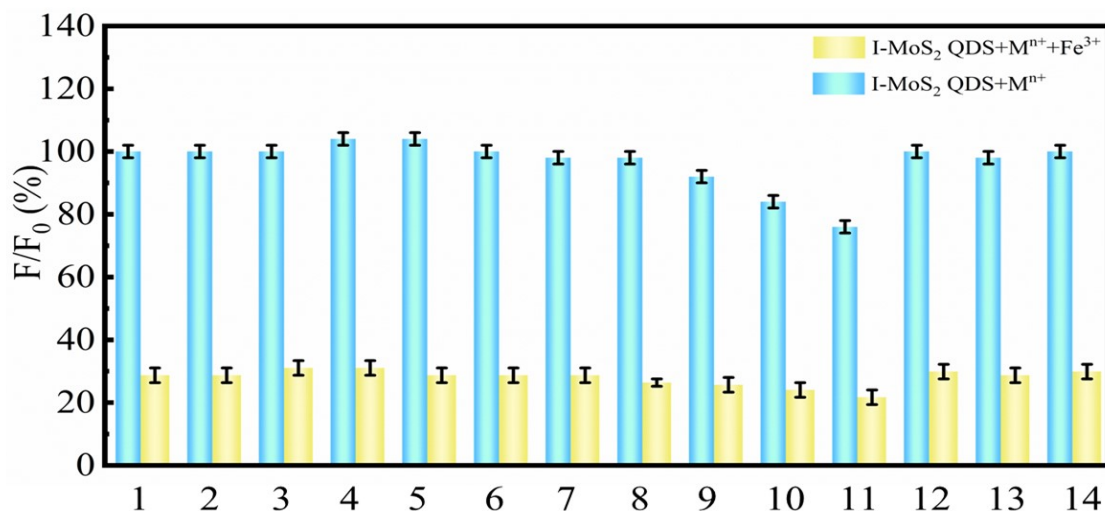

**Fig. S5** Interference of different metal ions and small molecules on the detection of Fe<sup>3+</sup> ions by I-MoS<sub>2</sub> QDs system (1=blank, 2=Na<sup>+</sup>, 3=K<sup>+</sup>, 4=Mg<sup>2+</sup>, 5=Ca<sup>2+</sup>, 6=Zn<sup>2+</sup>, 7=Cu<sup>2+</sup>, 8= Fe<sup>2+</sup>, 9=Co<sup>2+</sup>, 10=Ni<sup>2+</sup>, 11=Cr<sup>3+</sup> ions, 12=L-cysteine (CY), 13=alanine(AL), and 14=glycine(GL)).

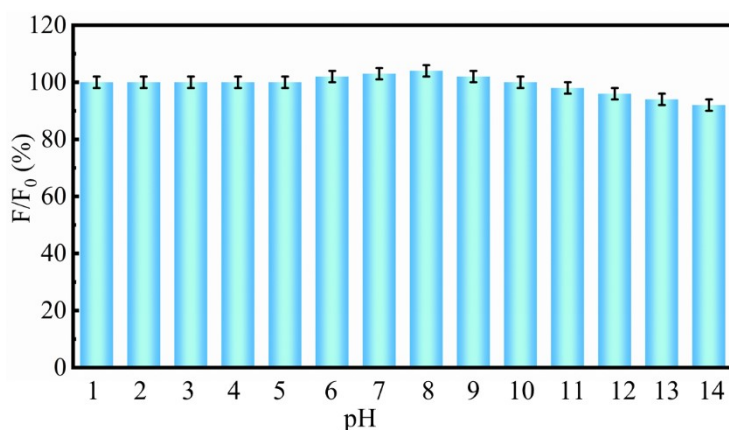

**Fig. S6** Change of fluorescence of I-MoS<sub>2</sub> QDs at different pH. (F<sub>0</sub> is the initial fluorescence intensity of the I-MoS<sub>2</sub> QDs. F is fluorescence intensity of the I-MoS<sub>2</sub> QDs at the different pH).

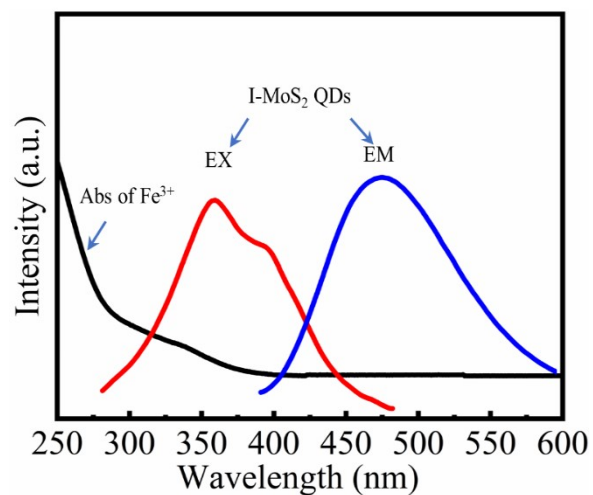

**Fig. S7** UV-vis absorbance spectrum of Fe<sup>3+</sup> ions, the fluorescent excitation (EX) and emission (EM) spectra of N-MoS<sub>2</sub> QDs.

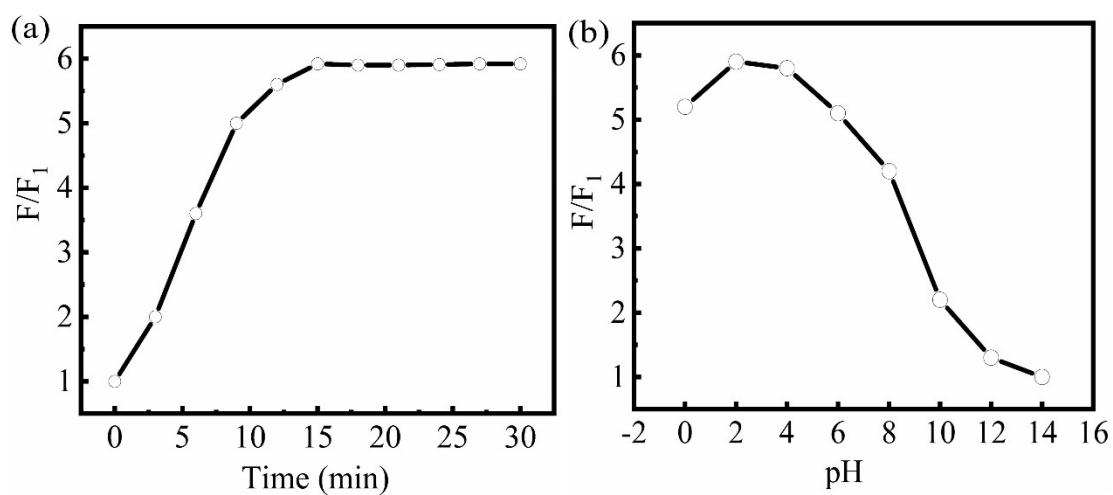

**Fig. S8** Fluorescence intensity ratios  $F/F_1$  versus incubation time (a) and pH (b) after the addition of F<sup>-</sup> ions into I-MoS<sub>2</sub> QDs/Fe<sup>3+</sup> system.  $F_1$  and  $F$  is fluorescence intensity of I-MoS<sub>2</sub> QDs/ Fe<sup>3+</sup> compound before and after adding F<sup>-</sup> ions.

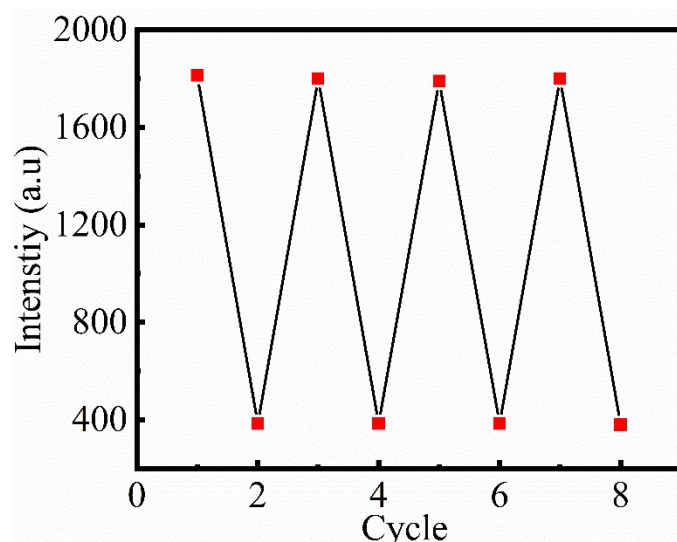

**Fig. S9** Fluorescence intensities of “turn-off-on” cycles as alternately addition of  $\text{Fe}^{3+}$  and  $\text{F}^-$  ions into I-MoS<sub>2</sub> QDs/ $\text{Fe}^{3+}$  system.

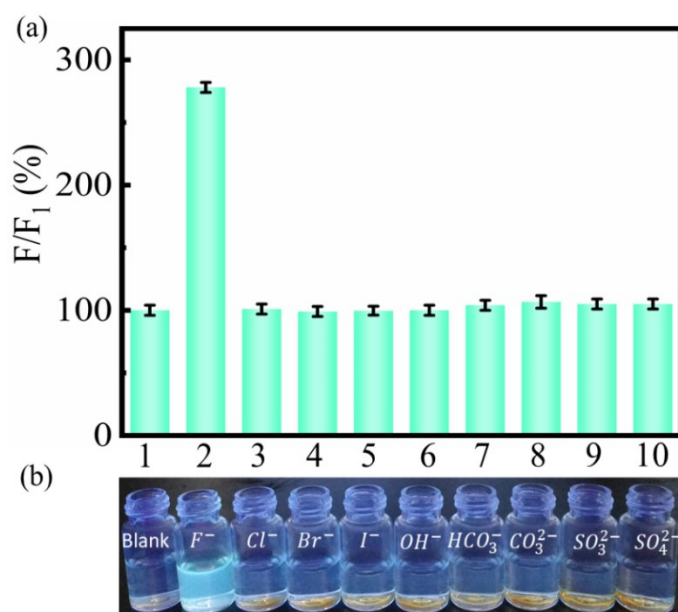

**Fig. S10** (a) Relative Fluorescence intensities of 10  $\mu\text{M}$  I-MoS<sub>2</sub> QDs mixed with 250  $\mu\text{M}$   $\text{Fe}^{3+}$  aqueous solution without and with various anions. Bars donate the emission intensity ratio  $F/F_1$  ( $F_1$  and  $F$  represent fluorescence intensities of I-MoS<sub>2</sub> QDs/  $\text{Fe}^{3+}$  system without and with different anions, 1=blank, 2= $\text{F}^-$ , 3= $\text{Cl}^-$ , 4= $\text{Br}^-$ , 5= $\text{I}^-$ , 6= $\text{OH}^-$ , 7= $\text{HCO}_3^-$ , 8= $\text{CO}_3^{2-}$ , 9= $\text{SO}_3^{2-}$  and 10= $\text{SO}_4^{2-}$ ). (b) Under 365 nm UV light, the corresponding pictures of I-MoS<sub>2</sub> QDs/ $\text{Fe}^{3+}$  system without and with different anions.

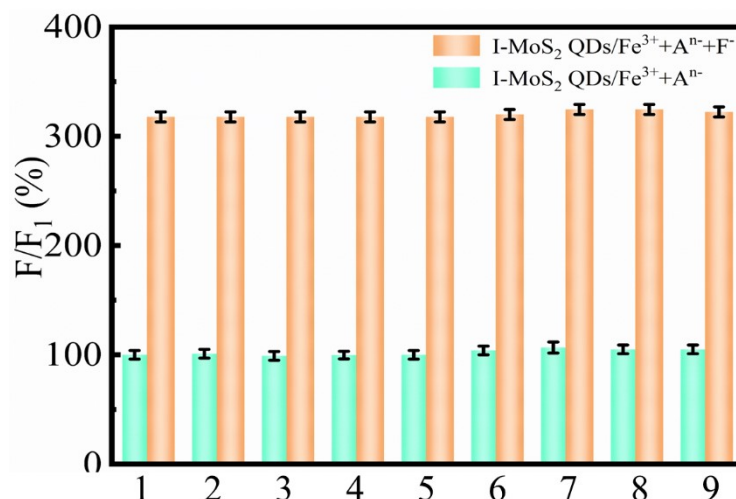

**Fig.S11** Interference of different anions on the detection of F<sup>-</sup> ions by I-MoS<sub>2</sub> QDs/Fe<sup>3+</sup> system (1=blank, 2=Cl<sup>-</sup>, 3=Br<sup>-</sup>, 4=I<sup>-</sup>, 5=OH<sup>-</sup>, 6=HCO<sub>3</sub><sup>-</sup>, 7=CO<sub>3</sub><sup>2-</sup>, 8=SO<sub>3</sub><sup>2-</sup> and 9=SO<sub>4</sub><sup>2-</sup>).

**Table S1.** Emission wavelengths (nm), FWHM, photoluminescence quantum yield (PLQY) of MoS<sub>2</sub> QDs samples labeled as S1, S2, S3 and S4.

| Sample | Emission wavelength<br>(nm) | FWHM<br>(nm) | PLQY<br>(%)      |
|--------|-----------------------------|--------------|------------------|
| S1     | 423                         | 95           | 6.8 <sup>a</sup> |
| S2     | 474                         | 98           | 7.1 <sup>a</sup> |
| S3     | 501                         | 105          | 6.4 <sup>b</sup> |
| S4     | 529                         | 110          | 5.7 <sup>b</sup> |

<sup>a</sup> Quinoline sulfate as a standard (PLQY = 55%). <sup>b</sup> Rhodamine 6G as a standard (PLQY =95%).

**Table S2.** Determination of F<sup>-</sup> ions by the fluorescent probes based on different quantum dots.

| Sensor               | Linearity   | LOD     | Ref. |
|----------------------|-------------|---------|------|
| CdS QDs              | 10–300 μM   | 6 μM    | 1    |
| CdS/ZnS QDs          | 300–5600 μM | 74.0 μM | 2    |
| CdTe QDs             | 0–10 mM     | 5.0 μM  | 3    |
| Ag doped CdS/ZnS QDs | 10–1200 μM  | 5.25 μM | 4    |
| Se,N-doped C QDs     | /           | 1.3 μM  | 5    |



|                                        |                        |                    |           |
|----------------------------------------|------------------------|--------------------|-----------|
| graphitic carbon nitride QDs           | 10–120 $\mu\text{M}$   | 4.06 $\mu\text{M}$ | 6         |
| Mn <sup>2+</sup> -doped ZnTe/ZnSe QDs  | 0.25–1.5 $\mu\text{M}$ | 0.1 $\mu\text{M}$  | 7         |
| Fe <sup>3+</sup> -MoS <sub>2</sub> QDs | 2.5-80 $\mu\text{M}$   | 1.4 $\mu\text{M}$  | This work |

**Table S3.** Determination of F<sup>-</sup> ( $\mu\text{M}$ ) in three water samples with I-MoS<sub>2</sub> QDs/Fe<sup>3+</sup> fluorescent probe and ion chromatograph (IC) method (n=3).

| Samples       | F <sup>-</sup> concentration<br>( $\mu\text{M}$ ) | found F <sup>-</sup><br>( $\mu\text{M}$ ) | Recovery<br>(%) | RSD<br>(%) | Found by IC<br>( $\mu\text{M}$ ) |
|---------------|---------------------------------------------------|-------------------------------------------|-----------------|------------|----------------------------------|
| Lake<br>water | 0                                                 | 26.20                                     | -               | 3.1        | 26.30±0.10                       |
|               | 5                                                 | 31.40                                     | 97.6            | 1.5        | 31.27±0.15                       |
|               | 10                                                | 36.50                                     | 102.0           | 2.0        | 36.40±0.20                       |
| Tap<br>water  | 0                                                 | 20.90                                     | -               | 2.9        | 20.50±0.15                       |
|               | 5                                                 | 25.34                                     | 98.4            | 1.3        | 25.44±0.18                       |
|               | 10                                                | 30.76                                     | 101.9           | 1.7        | 30.57±0.15                       |
| Well<br>water | 0                                                 | 42.3                                      | -               | 3.9        | 42.10±0.14                       |
|               | 5                                                 | 47.6                                      | 103.2           | 2.8        | 47.26±0.18                       |
|               | 10                                                | 52.2                                      | 98.9            | 1.8        | 52.09±0.15                       |

## 2. Formula and calculation

### 2.1 Photoluminescence quantum yield (PLQY)

PLQY of MoS<sub>2</sub> QDs was tested via a relative measuring method. PLQY of Quinoline sulfate aqueous solution (0.55 in 0.1 M diluted H<sub>2</sub>SO<sub>4</sub>) and Rhodamine 6G (0.95 in ethanol) were selected as reference materials. Absorbed optical density of the reference materials and MoS<sub>2</sub> QDs were kept under 0.1 to minimize re-absorption effects. The PLQY of MoS<sub>2</sub> QDs was calculated according to the formula:

$$\Phi_s = \Phi_r \times \left(\frac{A_r}{A_s}\right) \times \left(\frac{I_s}{I_r}\right) \times \left(\frac{n_s}{n_r}\right)^2$$

Where  $\Phi_s$  and  $\Phi_r$  represent PLQY of MoS<sub>2</sub> QDs samples and reference materials.  $A_s$  and  $A_r$  stand for absorbance of MoS<sub>2</sub> QDs samples and reference materials.  $I_s$  and  $I_r$  were integrated emission intensity of MoS<sub>2</sub> QDs samples and reference materials.  $n_s$

and  $n_r$  denoted respectively refractive index of solvents used for MoS<sub>2</sub> QDs and reference materials. DI water, ethanol and 0.1 M H<sub>2</sub>SO<sub>4</sub> are respectively used to dissolve MoS<sub>2</sub> QDs, Rhodamine 6G and Quinine Sulfate. Refractive index of DI water, ethanol and 0.1 M H<sub>2</sub>SO<sub>4</sub> are respectively 1.33, 1.36 and 1.63.

## 2.2 Computational detail of DFT

DFT calculations were conducted through the Vienna ab initio Simulation Package (VASP) with the projector augment wave method. The exchange-correlation function is treated with the generalized gradient approximation of the PBE functional. A plane-wave cutoff energy was set as 500 eV, and structure relaxation was performed until the convergence criteria of energy and force reached  $1 \times 10^{-5}$  eV and  $0.02 \text{ eV \AA}^{-1}$ , respectively. A vacuum layer of 20 Å was constructed to eliminate interactions between periodic structures of surface models. The Brillouin zone was sampled with  $4 \times 4 \times 1$  K points for MoS<sub>2</sub> (002) surface.

## 2.3 The Stern–Volmer equation

$$\frac{F_0 - F}{F} = K_{SV}C_q = K_q\tau_0C_q$$

Where  $F_0$  and  $F$  are the fluorescence-intensities of I-MoS<sub>2</sub> QDs with and without Fe<sup>3+</sup> ions;  $C_q$  is Fe<sup>3+</sup> ions concentration, and  $K_{SV}$  is  $0.0114 \text{ (}\mu\text{mol/L)}^{-1}$  obtained by the slope of the regression line. Here, the  $\tau_0$  is average fluorescence-lifetime of MoS<sub>2</sub> QDs about 1.42 ns. As-obtained quenching rate constant  $K_q$  is about  $8.03 \times 10^{12} \text{ (mol/L)}^{-1}\text{s}^{-1}$ , which is higher than  $1.0 \times 10^{10} \text{ (mol/L)}^{-1}\text{s}^{-1}$ .

### 3. References

- [1] S. Liu, H. Wang, Z. Cheng, H. Liu, *Sens. Actuators B-Chem.*, 2016,**232**, 306–312.
- [2] R.C. Mulrooney, N. Singh, N. Kaur, J.F. Callan, *Chem. Commun.*, 2009, 686–688.
- [3] J. Liu, X. Yang, K. Wang, R. Yang, H. Ji, L. Yang, C. Wu, A switchable fluorescent quantum dot probe based on aggregation/disaggregation mechanism, *Chem. Commun.* 2011,**47**, 935–937.
- [4] S.S. Boxi, S. Paria, Fluorometric selective detection of fluoride ions in aqueous media using ag doped CdS/ZnS core/shell nanoparticles, *Dalton Trans.* 2016,**45**, 811–819.
- [5] X. Zhang, X. Tan, Y. Hu, Blue/yellow emissive carbon dots coupled with curcumin: a hybrid sensor toward fluorescence turn-on detection of fluoride ion, *J. Hazard. Mater.*, 2021,**411**,125184–125191.
- [6] M. Devi, P. Das, P.K. Boruah, M.J. Deka, R. Duarah, A. Gogoi, D. Neog, H.S. Dutta, M.R. Das, Fluorescent graphitic carbon nitride and graphene oxide quantum dots as efficient nanozymes: colorimetric detection of fluoride ion in water by graphitic carbon nitride quantum dots, *J. Environ. Chem. Eng.*, 2021,**9**,104803–104816.
- [7] H. Wang, T.-Y. Hu, Z.-T. Zhao, X.-Y. Zhang, Y. Wang, X.Q. Duan, D.-W. Liu, L. Jing, Q. Ma, A novel Mn<sup>2+</sup>-doped core/shell quantum dot-based intracellular probe for fluoride anions sensing in MC3T3-E1 osteoblastic cells, *Talanta*, 2016, **149**,285–289.
